# Supplementary material for: Antisense oligonucleotide activity in tumour cells is influenced by intracellular LBPA distribution and extracellular vesicle recycling
Source: PubMed Central journal article supplement (PMC8560811; doi:10.1038/s42003-021-02772-0), 2021-11-01
Supplement: 42003_2021_2772_MOESM3_ESM.pdf [file 42003_2021_2772_MOESM3_ESM.pdf]

## Description of Additional Supplementary Files

**File name:** Supplementary Data 1

**Description:** Proteomic EV analysis.

**File name:** Supplementary Data 2

**Description:** Exclusive proteins in PC9 and LK2-derived EVs.

**File name:** Supplementary Data 3

**Description:** Raw data and western blots.
